# Supplementary material
Source: PubMed Central journal article supplement (PMC4963482)
Supplement: JCM.03354-15_zjm999095084so1.pdf [file JCM.03354-15_zjm999095084so1.pdf]

1

**TABLE S1.** Results obtained by real-time PCR with HRM analysis on a commensal *Neisseria* spp. validation panel (n=19)

| Species                 | Mean Tm (°C) |             |                          |                       |                    |                    |                         |                    |                         |
|-------------------------|--------------|-------------|--------------------------|-----------------------|--------------------|--------------------|-------------------------|--------------------|-------------------------|
|                         | <i>opa</i>   | <i>porA</i> | <i>penA</i><br>Gly545Ser | <i>penA</i><br>Ala501 | 23S rRNA<br>A2059G | 23S rRNA<br>C2611T | <i>gyrA</i><br>Ser91Phe | 16S rRNA<br>C1192T | <i>rpsE</i><br>Thr24Pro |
| <i>N. flava</i>         | -            | -           | -                        | -                     | 81.06              | 76.09              | -                       | 81.53              | -                       |
| <i>N. subflava</i>      | -            | -           | -                        | -                     | 81.12              | 76.20              | -                       | 81.55              | -                       |
| <i>N. mucosa</i>        | -            | -           | -                        | -                     | 81.02              | 76.10              | -                       | 81.53              | -                       |
| <i>N. mucosa</i>        | -            | -           | 85.11                    | 84.18                 | 81.09              | 76.08              | -                       | 81.52              | -                       |
| <i>N. mucosa</i>        | -            | -           | 85.23                    | 84.28                 | 81.14              | 76.10              | -                       | 81.79              | -                       |
| <i>N. cinerea</i>       | -            | -           | -                        | 83.91                 | 80.96              | 76.04              | -                       | 81.47              | -                       |
| <i>N. cinerea</i>       | -            | -           | -                        | 84.03                 | 81.01              | 75.97              | -                       | 81.48              | -                       |
| <i>N. flavescens</i>    | -            | -           | 85.05                    | 84.16                 | 81.00              | 76.06              | -                       | 81.55              | -                       |
| <i>N. sicca</i>         | -            | -           | -                        | 84.17                 | 81.08              | 76.12              | -                       | 81.57              | -                       |
| <i>N. sicca</i>         | -            | -           | -                        | -                     | 81.10              | 76.08              | -                       | 81.56              | -                       |
| <i>N. lactamica</i>     | -            | -           | -                        | -                     | 81.55              | 76.11              | -                       | 81.45              | -                       |
| <i>N. lactamica</i>     | -            | -           | -                        | -                     | 81.48              | 76.07              | -                       | 81.80              | -                       |
| <i>N. elongata</i>      | -            | -           | -                        | -                     | 81.06              | 76.09              | -                       | 81.80              | -                       |
| <i>N. meningitidis</i>  | -            | -           | -                        | -                     | 81.07              | 76.09              | -                       | 81.72              | 74.27                   |
| <i>N. meningitidis</i>  | -            | -           | -                        | 84.26                 | 81.02              | 76.09              | -                       | 81.78              | -                       |
| <i>N. meningitidis</i>  | -            | -           | -                        | 84.29                 | 81.08              | 76.06              | -                       | 81.82              | -                       |
| <i>N. meningitidis</i>  | -            | -           | -                        | -                     | 81.06              | 76.03              | -                       | 81.74              | 74.23                   |
| <i>N. meningitidis</i>  | -            | -           | -                        | -                     | 81.23              | 76.05              | -                       | 81.71              | 74.23                   |
| <i>N. bacilliformis</i> | -            | -           | -                        | -                     | 81.42              | 76.03              | -                       | 81.74              | -                       |

2
