# Supplementary material
Source: PubMed Central journal article supplement (PMC4963482)
Supplement: JCM.03354-15_zjm999095084so2.pdf [file JCM.03354-15_zjm999095084so2.pdf]

**Figure S1: Limit of detection**

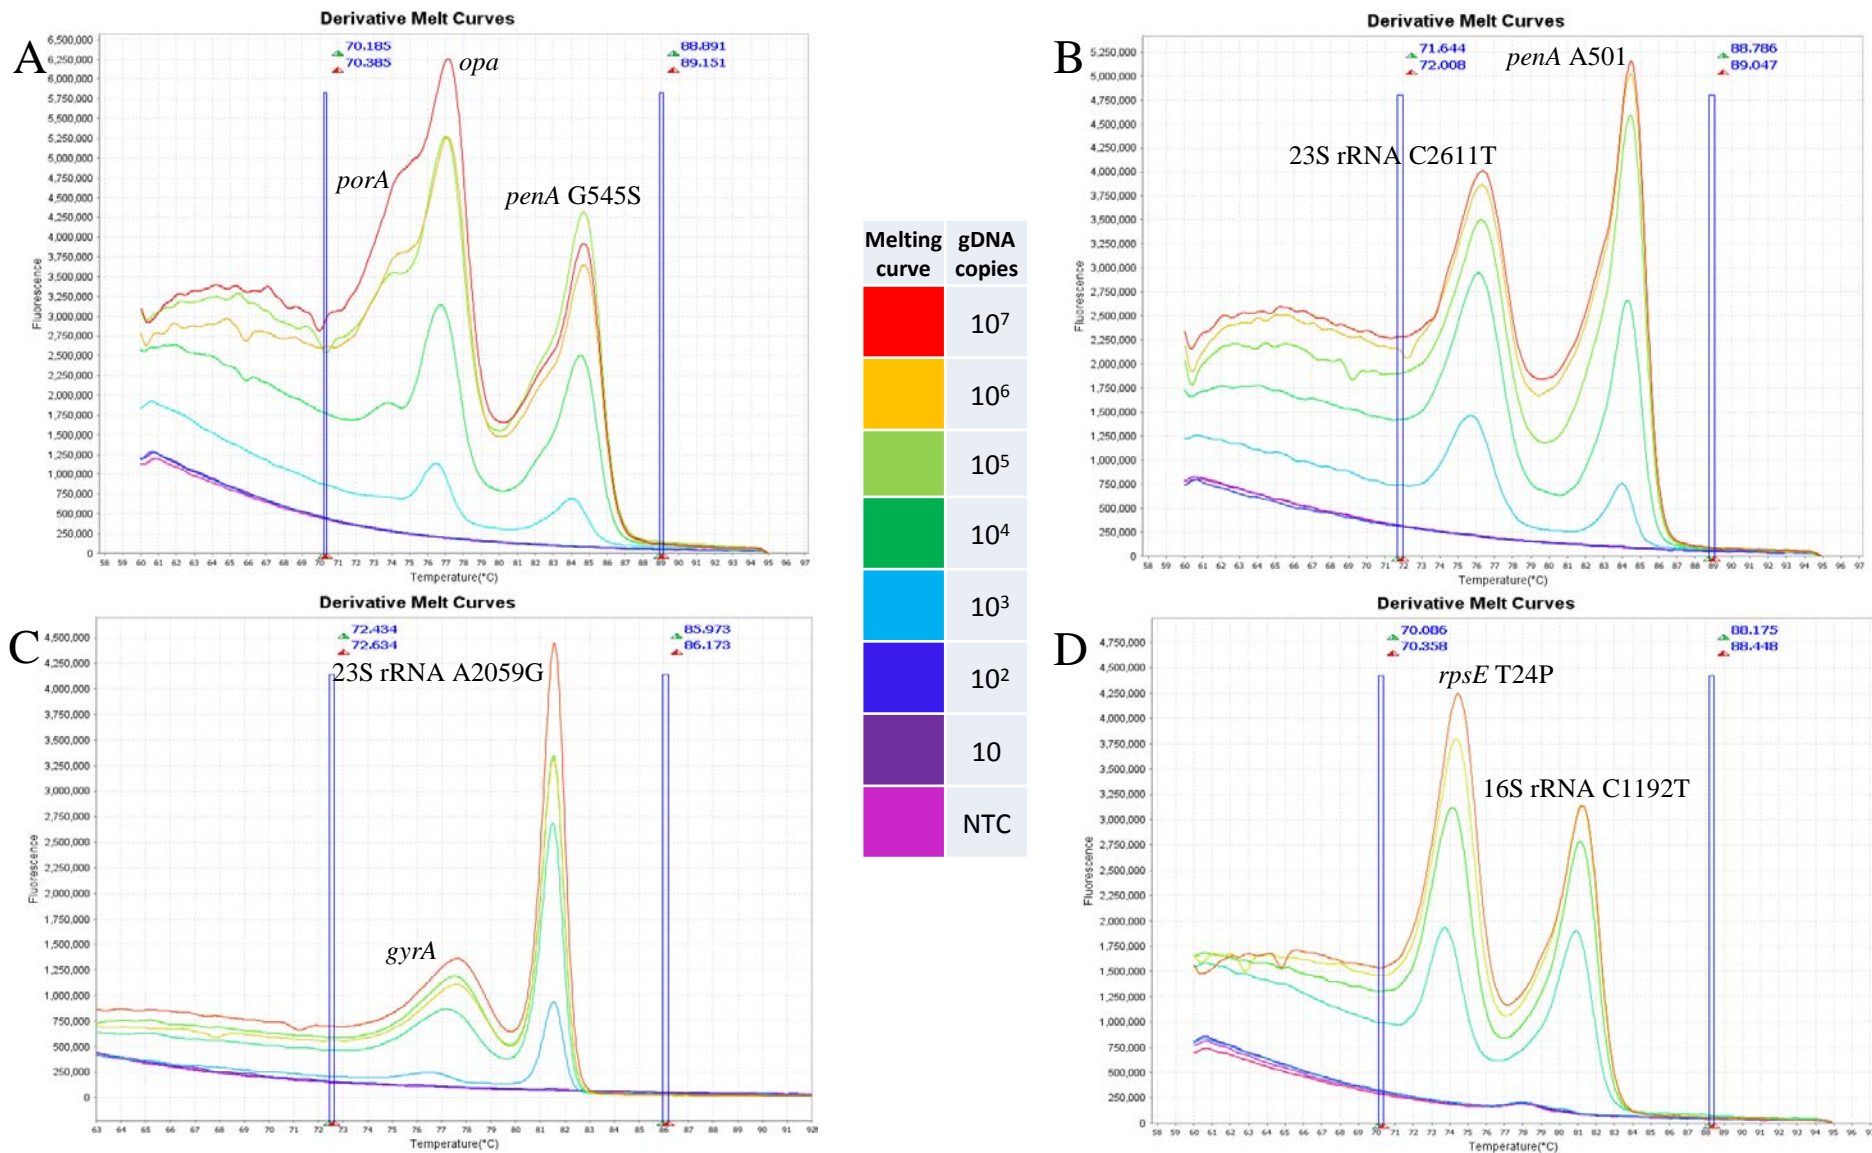

**Figure S1.: Limit of detection.** A) Triplex *opa* + *porA* + *penA* Gly545Ser. B) Duplex 23S rRNA C2611T + *penA* Ala501. C) Duplex *gyrA* Ser91Phe + 23S rRNA A2059G. D) Duplex *rpsE* Thr24Pro + 16S rRNA C1192T. The graphs show a representative example for each multiplex reaction. NTC, no template control. The limit of detection for all four multiplex reactions was 10<sup>3</sup>-10<sup>4</sup> gDNA copies/reaction. A strong influence of the initial template concentration on the melting temperature was observed, since the decrease of final amplicon amounts results in a decrease of the melting temperature. Therefore, comparison with controls with equal amounts of starting gDNA is required for proper melting curve analysis of samples containing ≤10<sup>5</sup> gDNA copies/reaction.
