# Supplementary material
Source: PubMed Central journal article supplement (PMC4963482)
Supplement: JCM.03354-15_zjm999095084so3.pdf [file JCM.03354-15_zjm999095084so3.pdf]

# Figure S2-A: Spiked negative pharyngeal samples

Triplex *opa* + *porA* + *penA* Gly545Ser

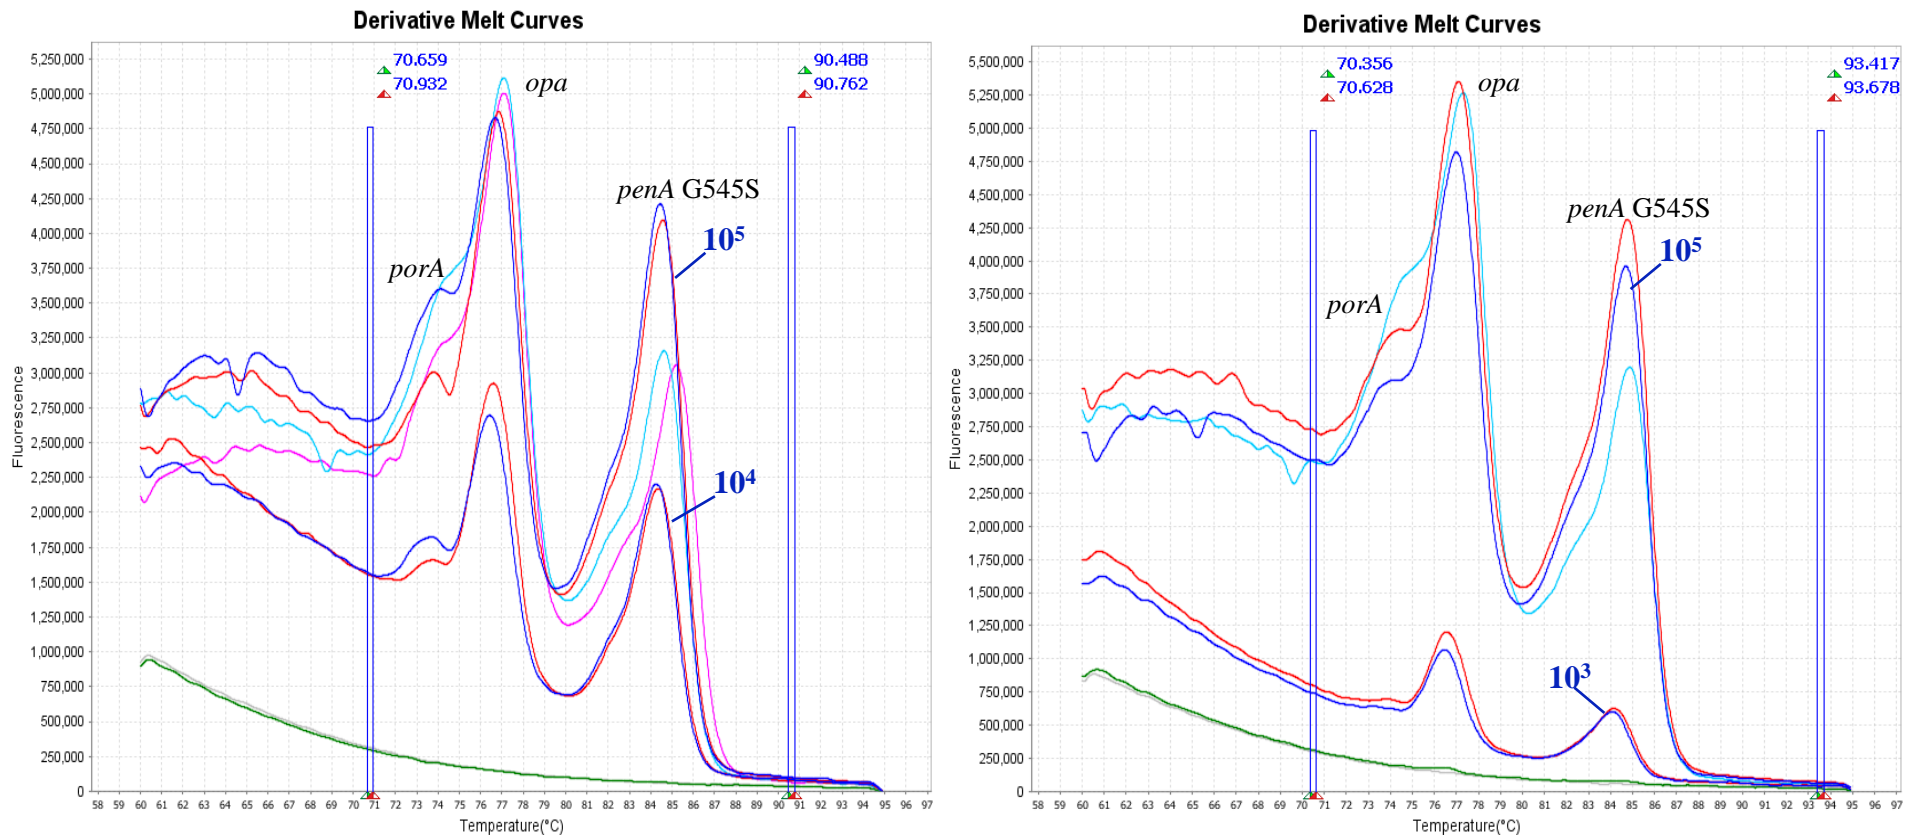

**Dark blue:** pharyngeal sample spiked with *Neisseria gonorrhoeae* (NG); mutated *penA* Gly545Ser  
**Red:** isolated culture of NG; mutated *penA* Gly545Ser  
**Light blue:** control NG; mutated *penA* Gly545Ser ( $10^7$  gDNA copies/reaction)  
**Pink:** control NG; WT *penA* Gly545 ( $10^7$  gDNA copies/reaction)  
**Green:** unspiked pharyngeal sample  
**Gray:** negative control

**Figure S2-A. Derivative melt curves of spiked pharyngeal specimens for the triplex reaction *opa* + *porA* + *penA* Gly545Ser.** Dark blue: pharyngeal sample spiked with *Neisseria gonorrhoeae* (NG) with mutated *penA* Gly545Ser. Red: isolated culture of NG with mutated *penA* Gly545Ser. Light blue: control NG with mutated *penA* Gly545Ser ( $10^7$  gDNA copies/reaction). Pink: control NG with wild-type (WT) *penA* Gly545 ( $10^7$  gDNA copies/reaction). Green: unspiked pharyngeal sample. Gray: negative control.

No background amplification from commensals was observed in all 4 specimens tested. No difference between reactions containing spiked specimens (dark blue) or solely the gDNA of the corresponding NG isolate at the same concentration (red) was observed.

# Figure S2-B: Spiked negative pharyngeal samples

Duplex 23S rRNA C2611T + *penA* Ala501

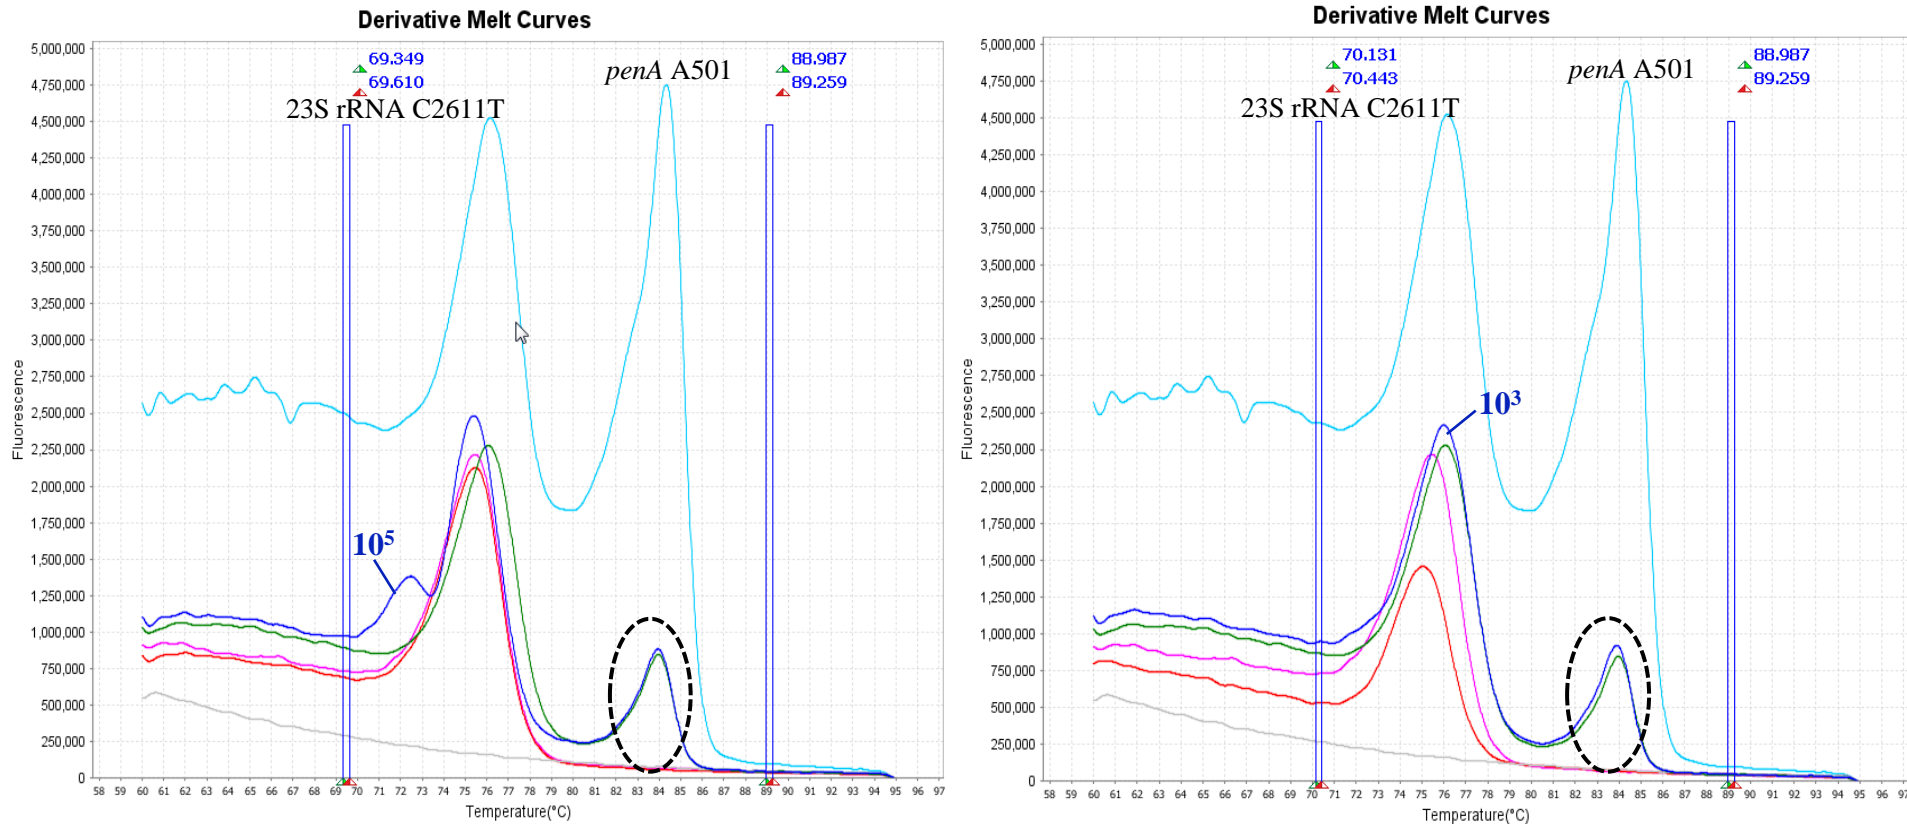

**Dark blue:** pharyngeal sample spiked with *Neisseria gonorrhoeae* (NG); mutated 23S rRNA C2611T, non-mosaic *penA*  
**Red:** isolated culture with NG; mutated 23S rRNA C2611T, non-mosaic *penA*  
**Light blue:** control NG; WT 23S rRNA C2611, mosaic *penA* (10<sup>7</sup> gDNA copies/reaction)  
**Pink:** control NG; mutated 23S rRNA C2611T, non-mosaic *penA* (10<sup>7</sup> gDNA copies/reaction)  
**Green:** unspiked pharyngeal sample  
**Gray:** negative control

**Figure S2-B. Derivative melt curves of spiked pharyngeal specimens for the duplex reaction 23S rRNA C2611T + *penA* Ala501.** Dark blue: pharyngeal sample spiked with *Neisseria gonorrhoeae* (NG) with mutated 23S rRNA C2611T and non-mosaic *penA*. Red: isolated culture of NG with mutated 23S rRNA C2611T and non-mosaic *penA*. Light blue: control NG with wild-type (WT) 23S rRNA C2611 and mosaic *penA* (10<sup>7</sup> gDNA copies/reaction). Pink: control NG with mutated 23S rRNA C2611T and non-mosaic *penA* (10<sup>7</sup> gDNA copies/reaction). Green: unspiked pharyngeal sample. Gray: negative control.

There was strong background amplification of WT 23S rRNA C2611 due to commensals in all 4 tested specimens, which completely masked the presence of the mutation in gonococcus in samples spiked with 10<sup>3</sup> gDNA copies. In samples spiked with both 10<sup>5</sup> and 10<sup>4</sup> gDNA copies/reaction the 23S rRNA C2611T mutation was still detectable, but a shoulder peak indicated the formation of heteroduplexes between the gonococcal mutated and the commensal WT sequences. Positive background amplification of the *penA* Ala501 reaction due to commensals was observed in 2 pharyngeal samples (dashed circle).

# Figure S2-C: Spiked negative pharyngeal samples

Duplex *gyrA* Ser91Phe + 23S rRNA A2059G

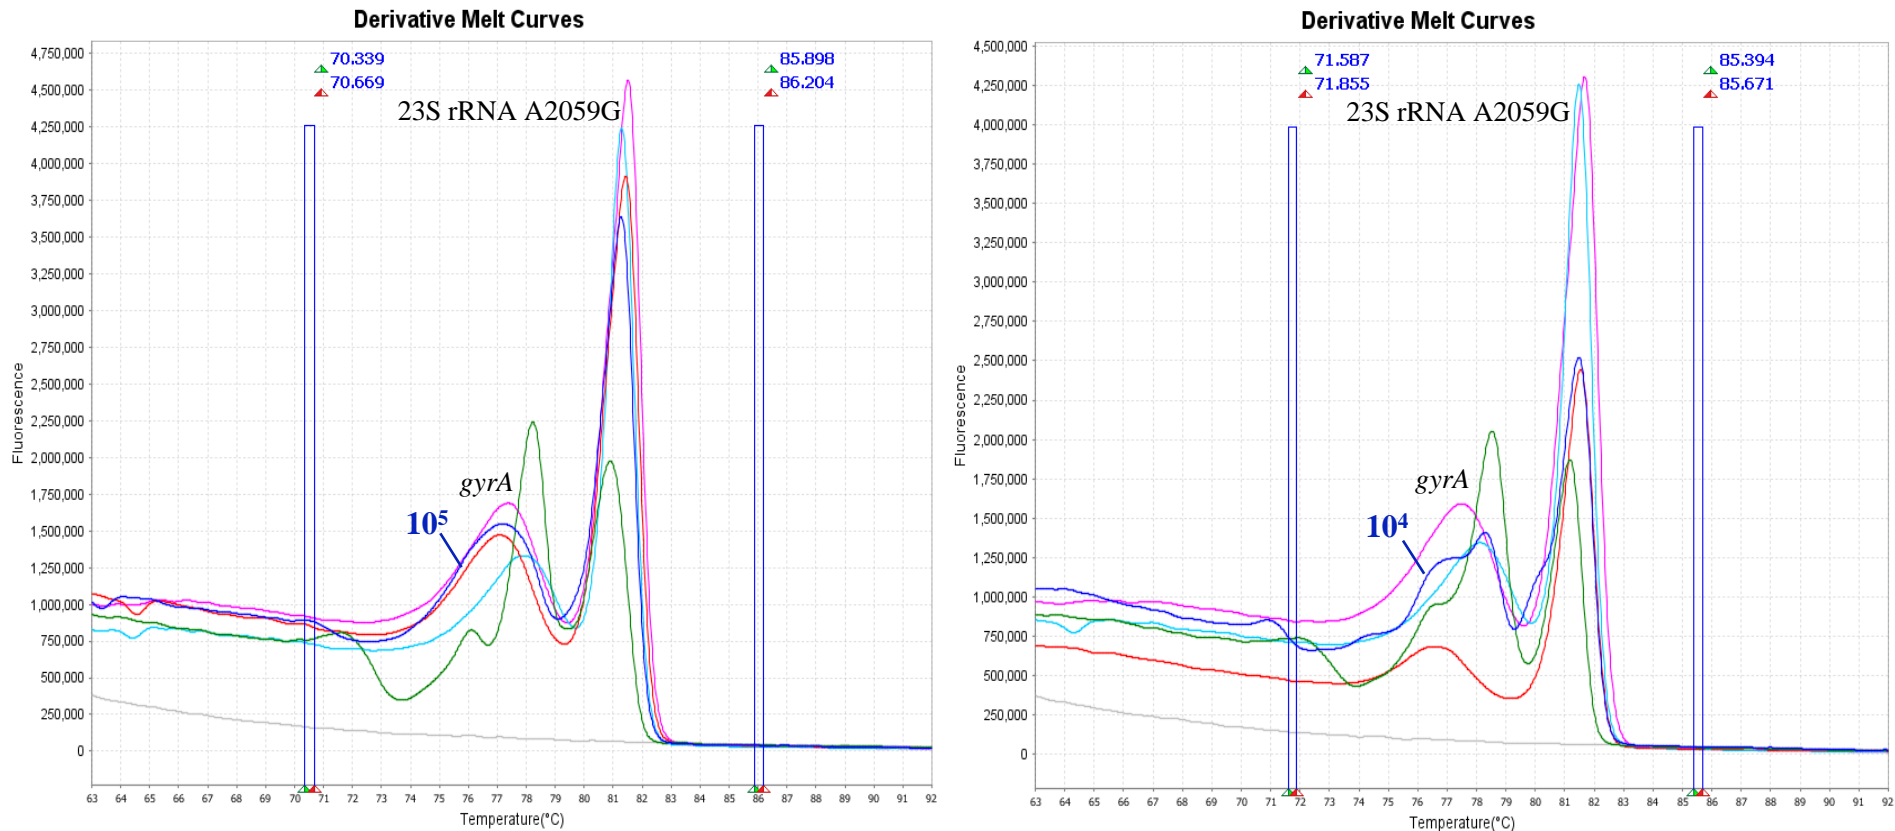

**Dark blue:** pharyngeal sample spiked with *Neisseria gonorrhoeae* (NG); mutated *gyrA* Ser91Phe, mutated 23S rRNA A2059G

**Red:** isolated culture with NG; mutated *gyrA* Ser91Phe, mutated 23S rRNA A2059G

**Light blue:** control NG; WT *gyrA* Ser91, WT 23S rRNA A2059 ( $10^7$  gDNA copies/reaction)

**Pink:** control NG; mutated *gyrA* Ser91Phe, mutated 23S rRNA A2059G ( $10^7$  gDNA copies/reaction)

**Green:** unspiked pharyngeal sample

**Gray:** negative control

**Figure S2-C. Derivative melt curves of spiked pharyngeal specimens for the duplex reaction *gyrA* Ser91Phe + 23S rRNA A2059G.** **Dark blue:** pharyngeal sample spiked with *Neisseria gonorrhoeae* (NG) with mutated *gyrA* Ser91Phe and mutated 23S rRNA A2059G. **Red:** isolated culture of NG with mutated *gyrA* Ser91Phe and mutated 23S rRNA A2059G. **Light blue:** control NG with mutated *gyrA* Ser91Phe and wild-type (WT) 23S rRNA A2059 ( $10^7$  gDNA copies/reaction). **Pink:** control NG with mutated *gyrA* Ser91Phe and mutated 23S rRNA A2059G ( $10^7$  gDNA copies/reaction). **Green:** unspiked pharyngeal sample. **Gray:** negative control.

There was strong aspecific amplification due to commensals in all 4 specimens (green). At  $10^5$  gDNA copies/reaction background amplification due to commensals masked the presence of the 23S rRNA A2059G mutation in gonococcus. Distinction of the *gyrA* Ser91Phe mutation by comparison with the appropriate controls ( $10^7$  gDNA copies/reaction) was only possible in samples containing  $10^5$  gDNA copies/reaction.

# Figure S2-D: Spiked negative pharyngeal samples

Duplex *rpsE* Thr24Pro + 16S rRNA C1192T

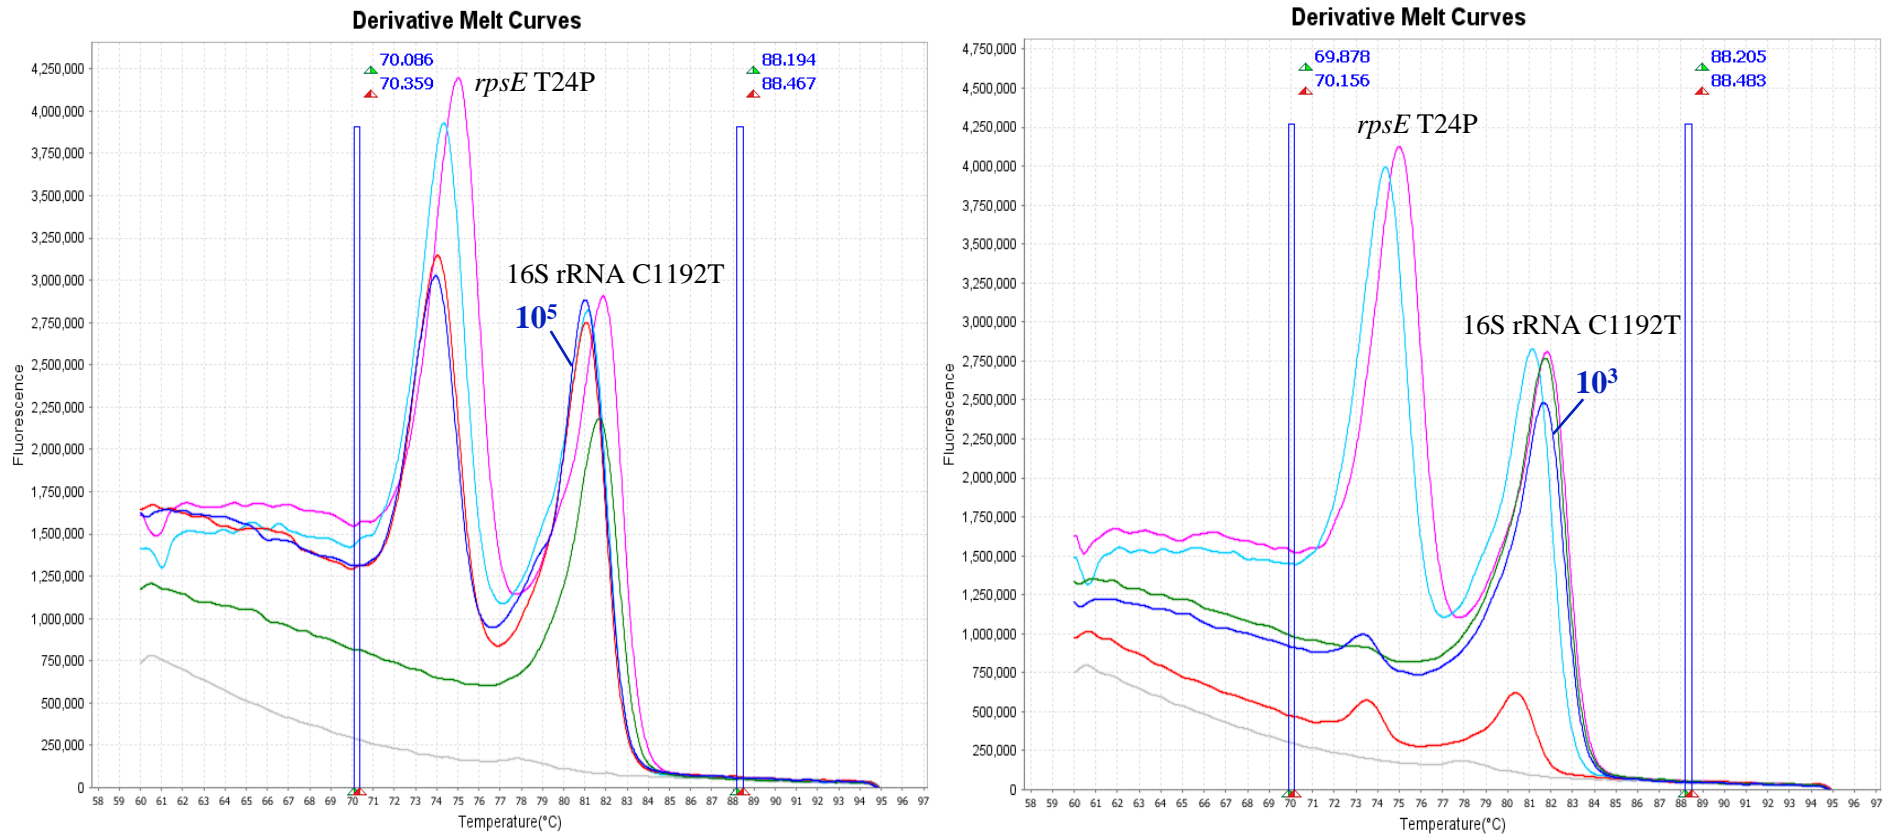

**Dark blue:** pharyngeal sample spiked with *Neisseria gonorrhoeae* (NG); WT *rpsE* Thr24, mutated 16S rRNA C1192T

**Red:** isolated culture with NG; WT *rpsE* Thr24, mutated 16S rRNA C1192T

**Light blue:** control NG; WT *rpsE* Thr24, mutated 16S rRNA C1192T ( $10^7$  gDNA copies/reaction)

**Pink:** control NG; mutated *rpsE* Thr24Pro, WT 16S rRNA C1192 ( $10^7$  gDNA copies/reaction)

**Green:** unspiked pharyngeal sample

**Gray:** negative control

**Figure S2-D. Derivative melt curves of spiked pharyngeal specimens for the duplex reaction *rpsE* Thr24Pro + 16S rRNA C1192T.** **Dark blue:** pharyngeal sample spiked with *Neisseria gonorrhoeae* (NG) with wild-type (WT) *rpsE* Thr24, mutated 16S rRNA C1192T. **Red:** isolated culture of NG with WT *rpsE* Thr24, mutated 16S rRNA C1192T. **Light blue:** control NG with WT *rpsE* Thr24, mutated 16S rRNA C1192T ( $10^7$  gDNA copies/reaction). **Pink:** control NG with mutated *rpsE* Thr24Pro and WT 16S rRNA C1192 ( $10^7$  gDNA copies/reaction). **Green:** unspiked pharyngeal sample. **Gray:** negative control.

There was strong background amplification due to commensals for the 16S rRNA C1192T reaction in all 4 tested specimens (green), which masked the presence of the 16S rRNA C1192T mutation in gonococcus in samples spiked with  $10^3$  gDNA copies.



# Figure S2-E: Spiked negative pharyngeal samples

Duplex *rpsE* Thr24Pro + 16S rRNA C1192T

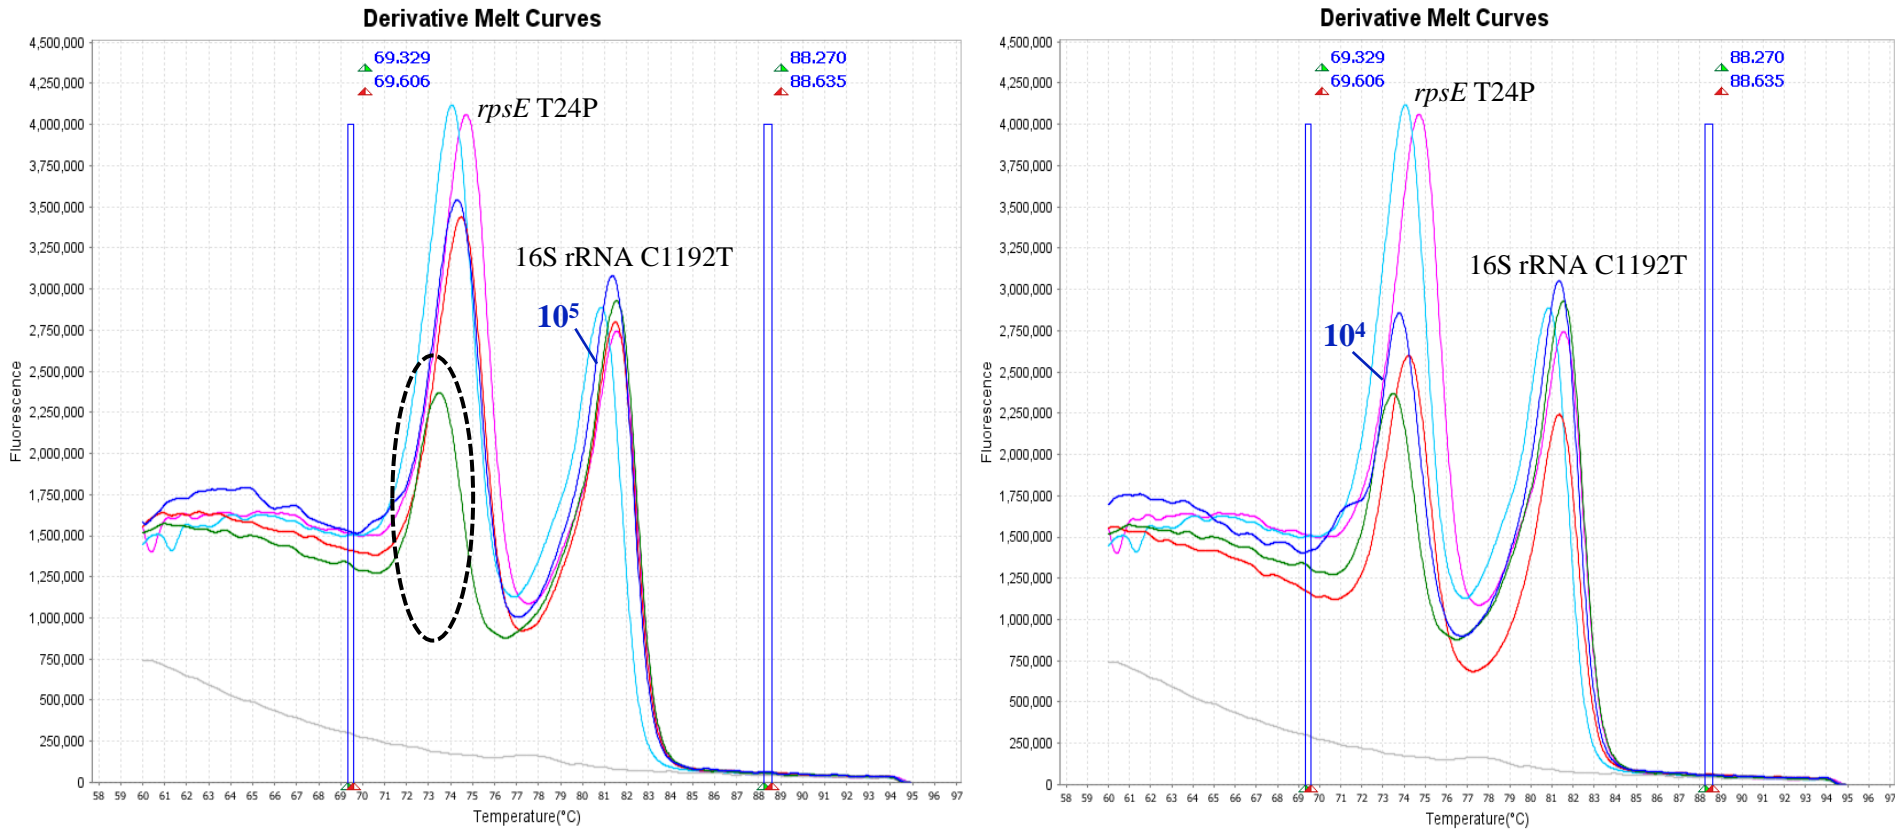

**Dark blue:** pharyngeal sample spiked with *Neisseria gonorrhoeae* (NG); mutated *rpsE* Thr24Pro, WT 16S rRNA C1192  
**Red:** isolated culture with NG; mutated *rpsE* Thr24Pro, WT 16S rRNA C1192  
**Light blue:** control NG; WT *rpsE* Thr24, mutated 16S rRNA C1192T ( $10^7$  gDNA copies/reaction)  
**Pink:** control NG; mutated *rpsE* Thr24Pro, WT 16S rRNA C1192 ( $10^7$  gDNA copies/reaction)  
**Green:** unspiked pharyngeal sample  
**Gray:** negative control

**Figure S2-E. Derivative melt curves of spiked pharyngeal specimens for the duplex reaction *rpsE* Thr24Pro + 16S rRNA C1192T.** **Dark blue:** pharyngeal sample spiked with *Neisseria gonorrhoeae* (NG) with mutated *rpsE* Thr24Pro, wild-type (WT) 16S rRNA C1192. **Red:** isolated culture of NG with mutated *rpsE* Thr24Pro, WT 16S rRNA C1192. **Light blue:** control NG with WT *rpsE* Thr24, mutated 16S rRNA C1192T ( $10^7$  gDNA copies/reaction). **Pink:** control NG with mutated *rpsE* Thr24Pro and WT 16S rRNA C1192 ( $10^7$  gDNA copies/reaction). **Green:** unspiked pharyngeal sample. **Gray:** negative control.

Strong background amplification due to commensals for the *rpsE* Thr24Pro reaction was observed in one specimen (green, dashed circle), which masked the presence of the *rpsE* Thr24Pro mutation in gonococcus in samples spiked with  $10^4$  gDNA copies.

# Figure S3-A: Spiked negative rectal samples

Triplex *opa+porA+penA* Gly545Ser

Derivative Melt Curves

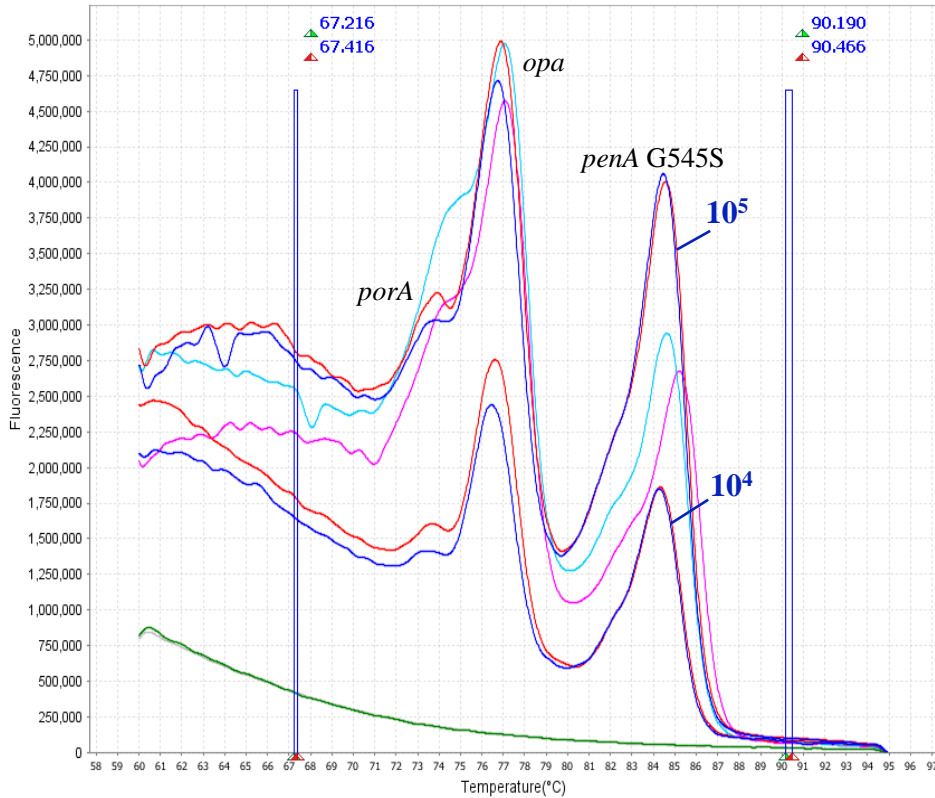

Derivative Melt Curves

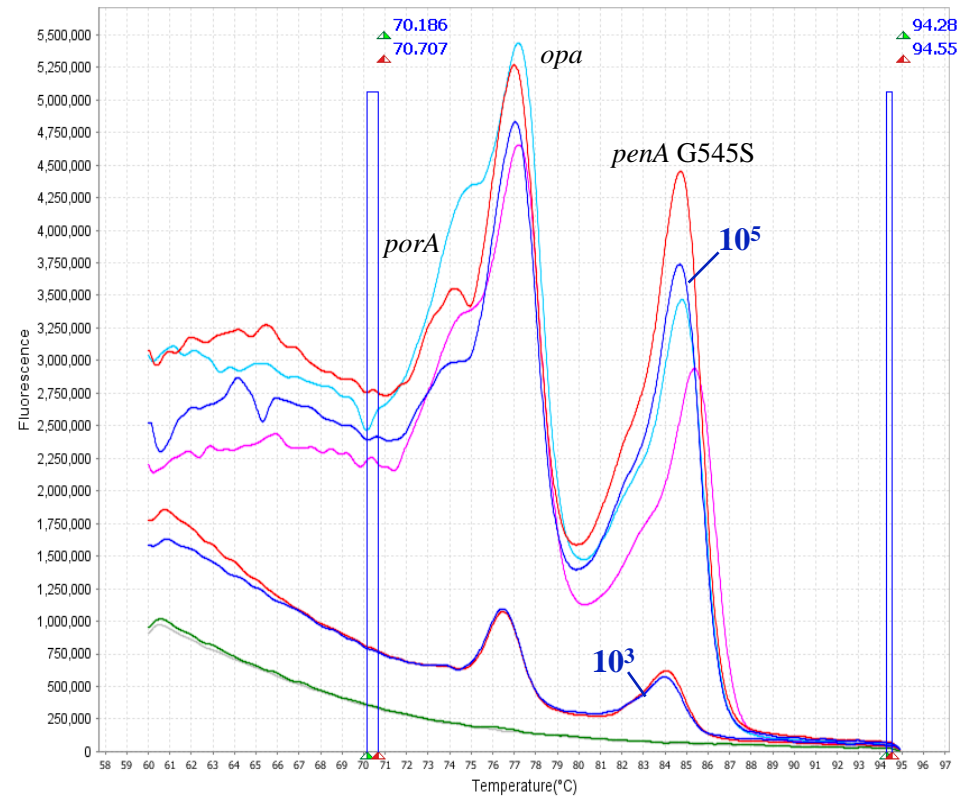

**Dark blue:** rectal sample spiked with *Neisseria gonorrhoeae* (NG); mutated *penA* Gly545Ser  
**Red:** isolated culture with NG; mutated *penA* Gly545Ser  
**Light blue:** control NG; mutated *penA* Gly545Ser ( $10^7$  gDNA copies/reaction)  
**Pink:** control NG; WT *penA* Gly545 ( $10^7$  gDNA copies/reaction)  
**Green:** unspiked rectal sample  
**Gray:** negative control

**Figure S3-A. Derivative melt curves of spiked rectal specimens for the triplex reaction *opa + porA + penA* Gly545Ser.** **Dark blue:** rectal sample spiked with *Neisseria gonorrhoeae* (NG) with mutated *penA* Gly545Ser. **Red:** isolated culture of NG with mutated *penA* Gly545Ser. **Light blue:** control NG with mutated *penA* Gly545Ser ( $10^7$  gDNA copies/reaction). **Pink:** control NG with wild-type (WT) *penA* Gly545 ( $10^7$  gDNA copies/reaction). **Green:** unspiked rectal sample. **Gray:** negative control.

No background amplification from commensals was observed in all 4 specimens tested. No difference between reactions containing spiked specimens (dark blue) or solely the gDNA of the corresponding NG isolate at the same concentration (red) was observed.

# Figure S3-B: Spiked negative rectal samples

Duplex 23S rRNA C2611T+*penA* Ala501

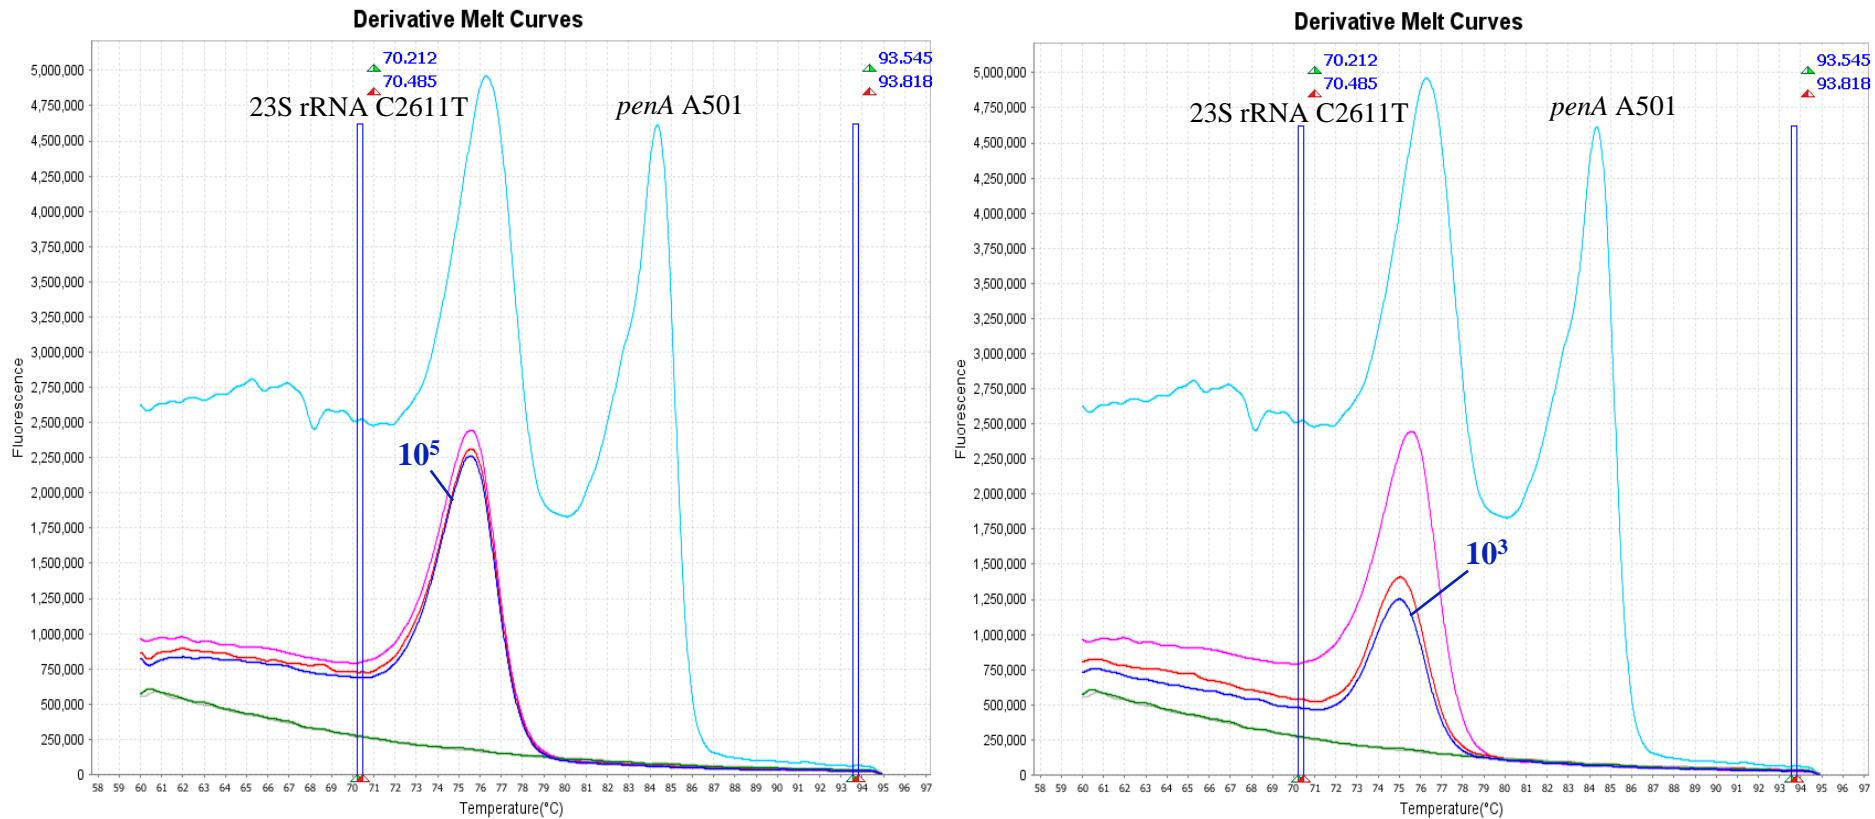

**Dark blue:** rectal sample spiked with *Neisseria gonorrhoeae* (NG); mutated 23S rRNA C2611T, non-mosaic *penA*  
**Red:** isolated culture with NG; mutated 23S rRNA C2611T, non-mosaic *penA*  
**Light blue:** control NG; WT 23S rRNA C2611, mosaic *penA* ( $10^7$  gDNA copies/reaction)  
**Pink:** control NG; mutated 23S rRNA C2611T, non-mosaic *penA* ( $10^7$  gDNA copies/reaction)  
**Green:** unspiked rectal sample  
**Gray:** negative control

**Figure S3-B. Derivative melt curves of spiked rectal specimens for the duplex reaction 23S rRNA C2611T + *penA* Ala501.** **Dark blue:** rectal sample spiked with *Neisseria gonorrhoeae* (NG) with mutated 23S rRNA C2611T and non-mosaic *penA*. **Red:** isolated culture of NG with mutated 23S rRNA C2611T and non-mosaic *penA*. **Light blue:** control NG with wild-type (WT) 23S rRNA C2611 and mosaic *penA* ( $10^7$  gDNA copies/reaction). **Pink:** control NG with mutated 23S rRNA C2611T and non-mosaic *penA* ( $10^7$  gDNA copies/reaction). **Green:** unspiked rectal sample. **Gray:** negative control.

No background amplification from commensals was observed in all 4 specimens tested. No difference between reactions containing spiked specimens (dark blue) or solely the gDNA of the corresponding NG isolate at the same concentration (red) was observed.

# Figure S3-C: Spiked negative rectal samples

Duplex *gyrA* Ser91Phe+ 23S rRNA A2059G

Derivative Melt Curves

Derivative Melt Curves

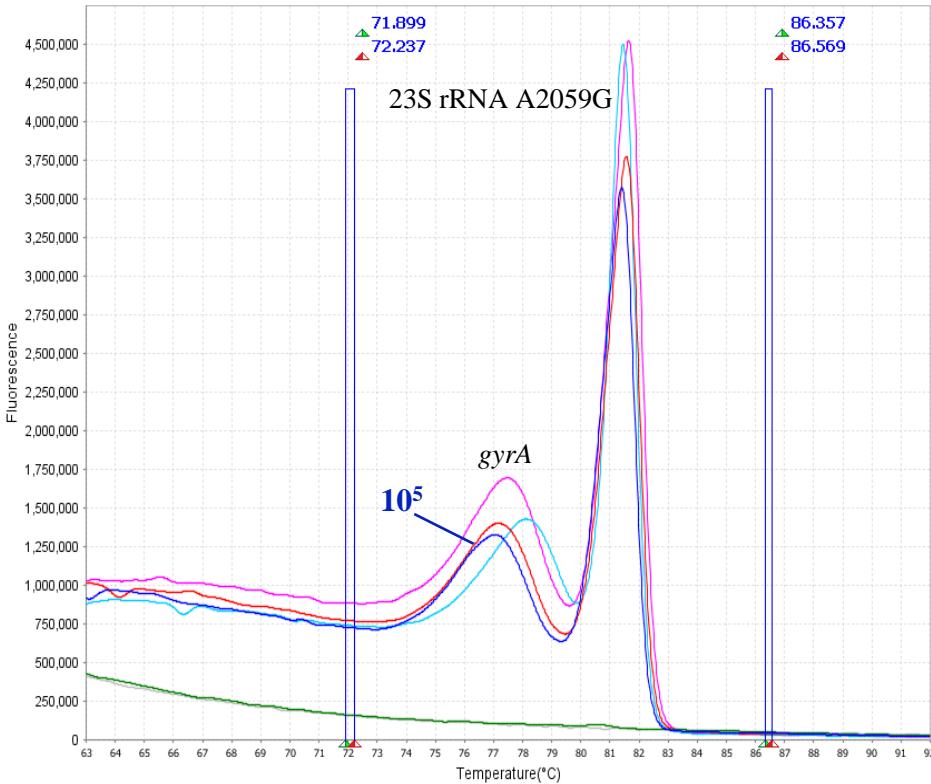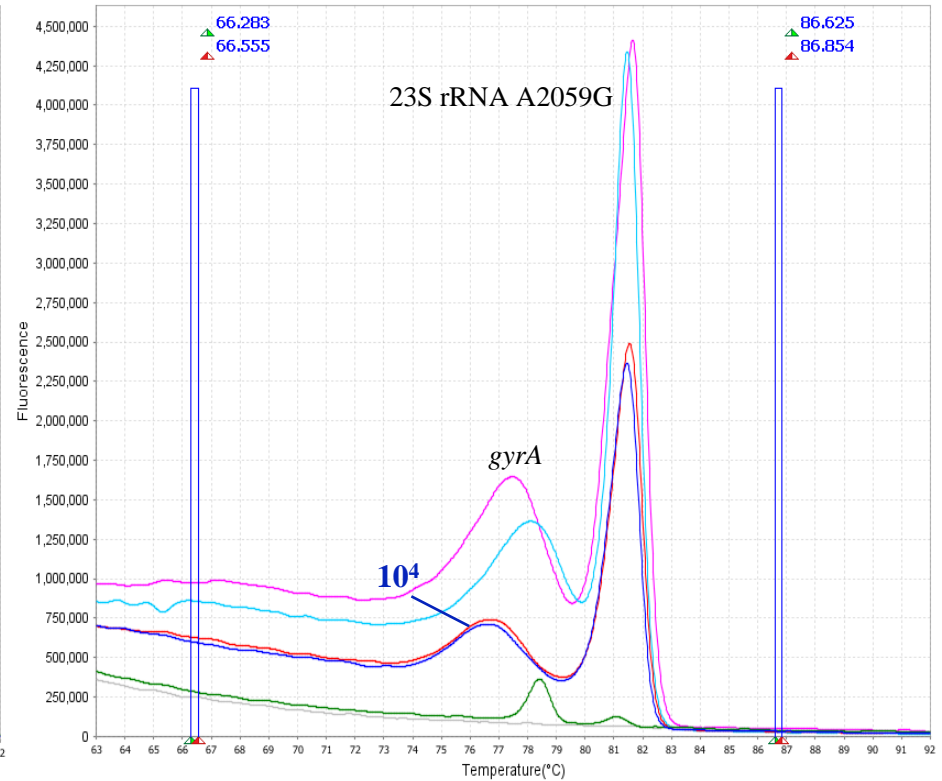

**Dark blue:** rectal sample spiked with *Neisseria gonorrhoeae* (NG); mutated *gyrA* Ser91Phe, mutated 23S rRNA A2059G

**Red:** isolated culture with NG; mutated *gyrA* Ser91Phe, mutated 23S rRNA A2059G

**Light blue:** control NG; WT *gyrA* Ser91, WT 23S rRNA A2059 (10<sup>7</sup> gDNA copies/reaction)

**Pink:** control NG; mutated *gyrA* Ser91Phe, mutated 23S rRNA A2059G (10<sup>7</sup> gDNA copies/reaction)

**Green:** unspiked rectal sample

**Gray:** negative control

**Figure S3-C. Derivative melt curves of spiked rectal specimens for the duplex reaction *gyrA* Ser91Phe + 23S rRNA A2059G.** **Dark blue:** rectal sample spiked with *Neisseria gonorrhoeae* (NG) with mutated *gyrA* Ser91Phe and mutated 23S rRNA A2059G. **Red:** isolated culture of NG with mutated *gyrA* Ser91Phe and mutated 23S rRNA A2059G. **Light blue:** control NG with mutated *gyrA* Ser91Phe and wild-type (WT) 23S rRNA A2059 (10<sup>7</sup> gDNA copies/reaction). **Pink:** control NG with mutated *gyrA* Ser91Phe and mutated 23S rRNA A2059G (10<sup>7</sup> gDNA copies/reaction). **Green:** unspiked rectal sample. **Gray:** negative control.

There was little or no background amplification due to commensals in all 4 rectal specimens. However, in all 4 samples the T<sub>m</sub> of the mutated 23S rRNA A2059G amplicon (blue) was decreased in comparison to the T<sub>m</sub> observed for the corresponding NG isolate (red) strongly affecting the interpretation of the melting curve.



# Figure S3-D: Spiked negative rectal samples

Duplex *rpsE* Thr24Pro + 16S rRNA C1192T

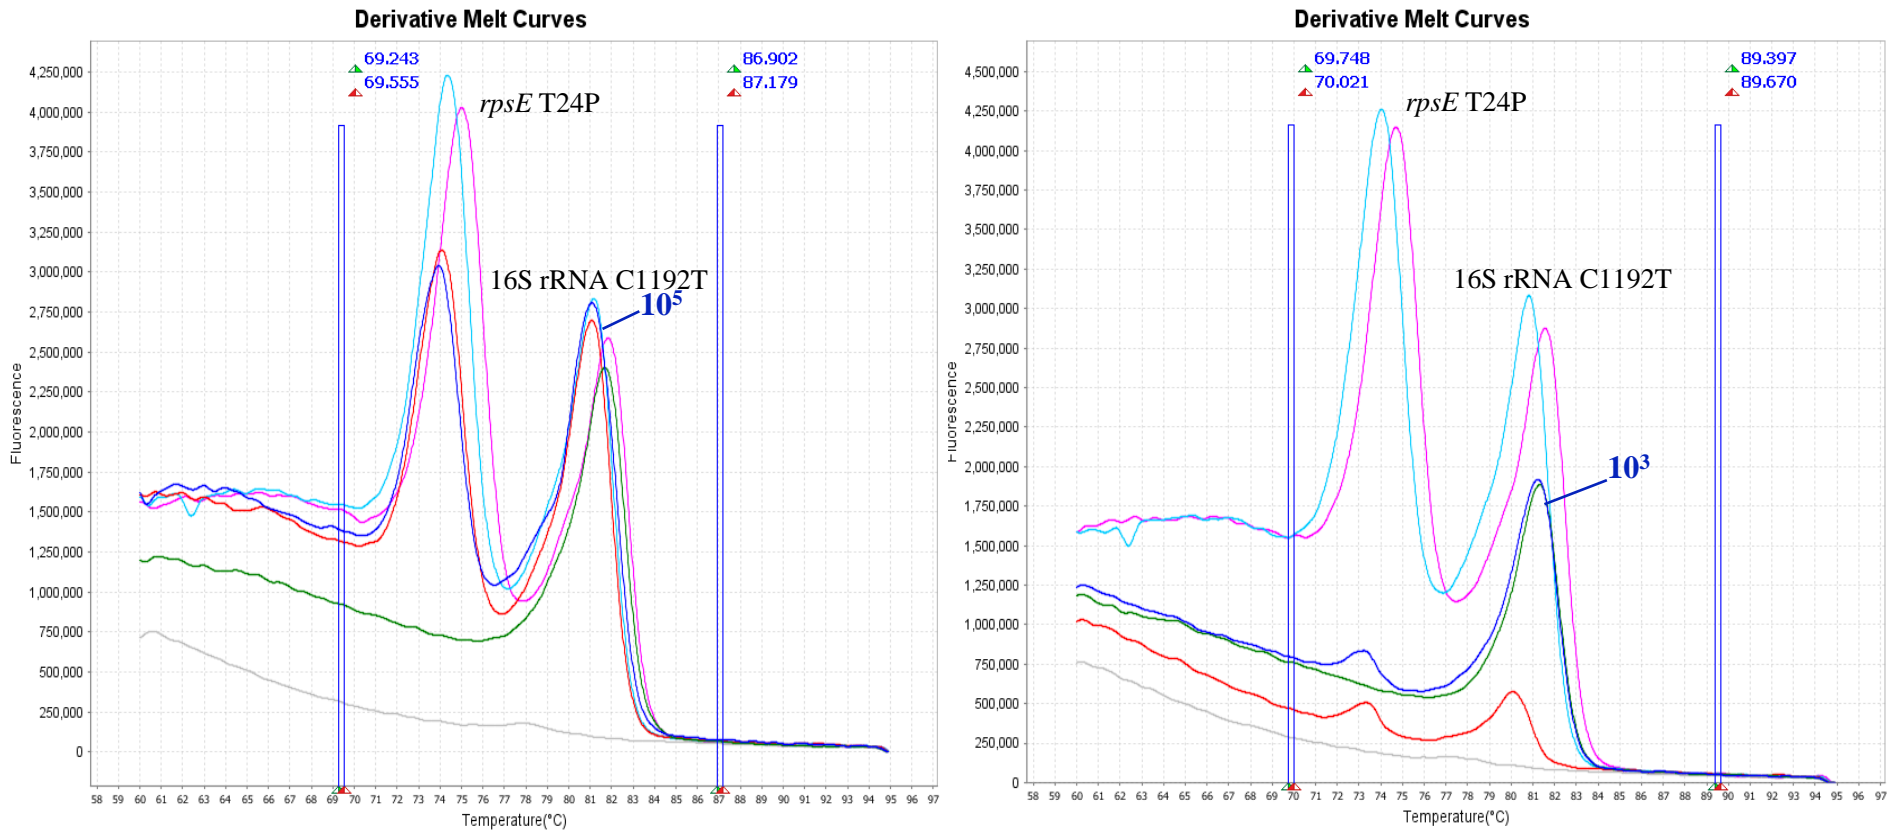

**Dark blue:** rectal sample spiked with *Neisseria gonorrhoeae* (NG); WT *rpsE* Thr24, mutated 16S rRNA C1192T

**Red:** isolated culture with NG; WT *rpsE* Thr24, mutated 16S rRNA C1192T

**Light blue:** control NG; WT *rpsE* Thr24, mutated 16S rRNA C1192T ( $10^7$  gDNA copies/reaction)

**Pink:** control NG; mutated *rpsE* Thr24Pro, WT 16S rRNA C1192 ( $10^7$  gDNA copies/reaction)

**Green:** unspiked rectal sample

**Gray:** negative control

**Figure S3-D. Derivative melt curves of spiked rectal specimens for the duplex reaction *rpsE* Thr24Pro + 16S rRNA C1192T.** **Dark blue:** rectal sample spiked with *Neisseria gonorrhoeae* (NG) with wild-type (WT) *rpsE* Thr24 and mutated 16S rRNA C1192T. **Red:** isolated culture of NG with WT *rpsE* Thr24 and mutated 16S rRNA C1192T. **Light blue:** control NG with WT *rpsE* Thr24 and mutated 16S rRNA C1192T ( $10^7$  gDNA copies/reaction). **Pink:** control NG with mutated *rpsE* Thr24Pro and WT 16S rRNA C1192 ( $10^7$  gDNA copies/reaction). **Green:** unspiked rectal sample. **Gray:** negative control.

Background amplification due to commensals was observed in all 4 samples, which masked the presence of the 16S rRNA C1192T mutation in samples spiked with low amounts of gonococcal gDNA ( $10^3$  gDNA copies/reaction).
